# Supplementary material for: Highly sensitive and selective detection of mercury ions based on up-conversion FRET from NaYF4:Yb3+/Er3+ nanophosphors to CdTe quantum dots
Source: Royal Society of Chemistry journal article supplement (doi:10.1039/c5ra16200a), 2015-01-01
Supplement: c5ra16200a1.pdf [file c5ra16200a1.pdf]

Electronic Supplementary Information (ESI) available:

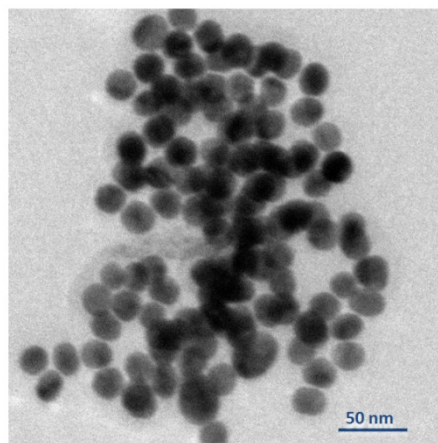

Figure S1 TEM image of NaYF<sub>4</sub> UCNPs.

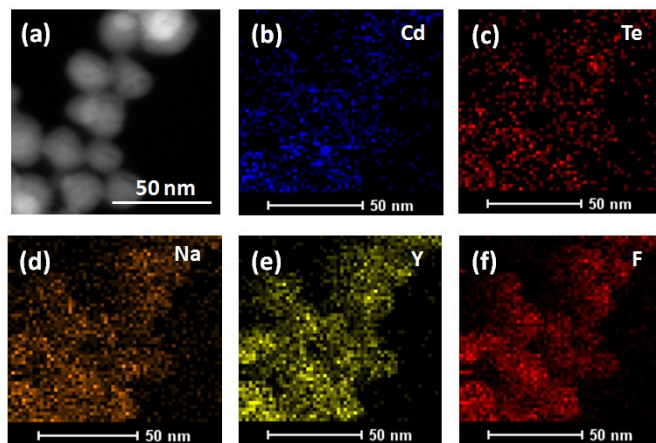

Figure S2 (a) TEM and (b-f) Elemental mappings of NaYF<sub>4</sub>/CdTe QDs.

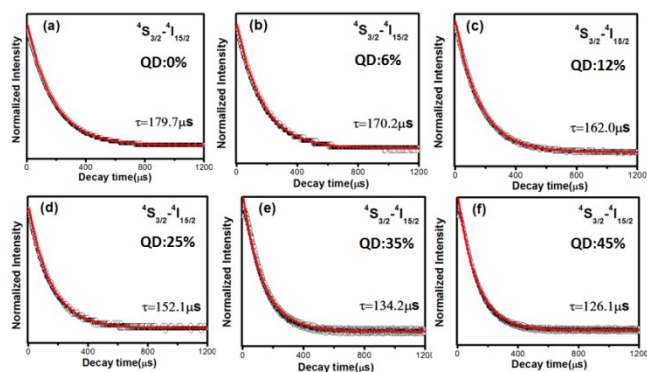

Figure S3 Dynamic curves of <sup>4</sup>S<sub>3/2</sub>-<sup>4</sup>I<sub>15/2</sub> transition of Er<sup>3+</sup> at different QD1 concentration under 980 nm light excitation.

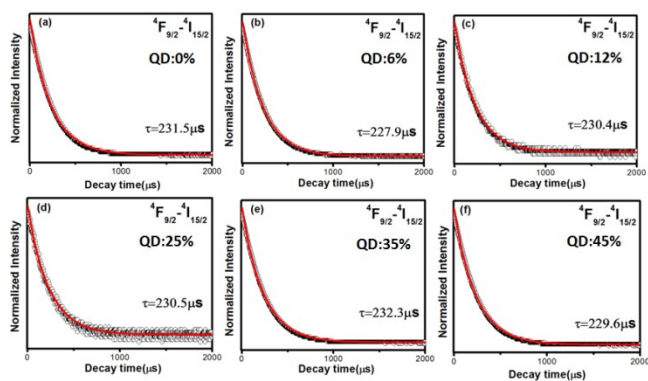

Figure S4 Dynamic curves of  ${}^4F_{9/2} - {}^4I_{15/2}$  transition of  $Er^{3+}$  at different QD1 concentration under 980 nm light excitation.

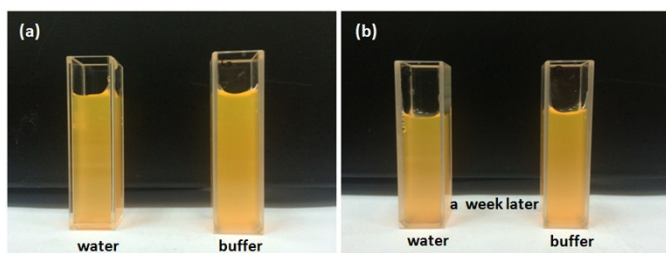

Figure S5 (a) The photograph of the complex of UCNP and QDs (The concentration of the QDs is 45%) in water or buffer solution; (b) The photograph of the complex of UCNP and QDs (The concentration of the QDs is 45%) in water or buffer solution after a week.

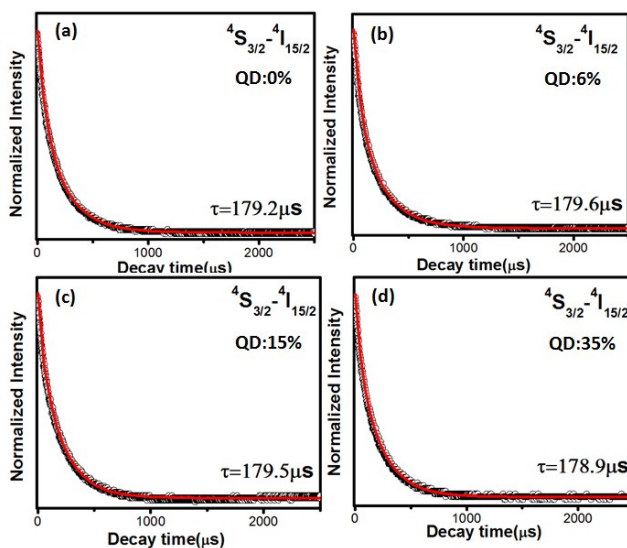

Figure S6 Dynamic curves of  ${}^4S_{3/2} - {}^4I_{15/2}$  transition of  $Er^{3+}$  at different QD2 concentration under 980 nm light excitation.

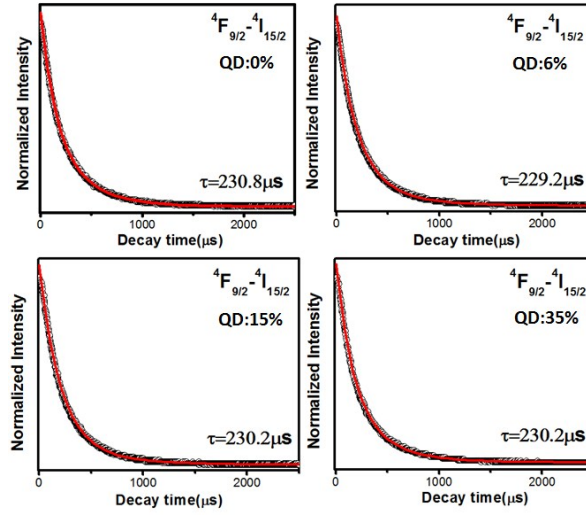

Figure S7 Dynamic curves of  ${}^4F_{9/2} - {}^4I_{15/2}$  transition of  $Er^{3+}$  at different QD2 concentration under 980 nm light excitation.

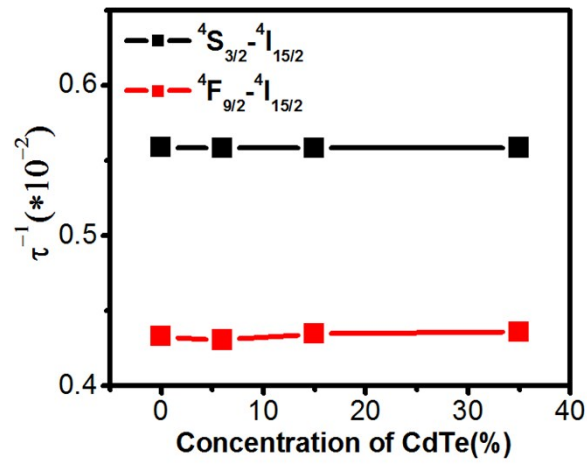

Figure S8 Inverse of the  ${}^4S_{3/2}$ ,  ${}^4F_{9/2} - {}^4I_{15/2}$  transition decay time at different QD2 concentration under 980 nm light excitation.

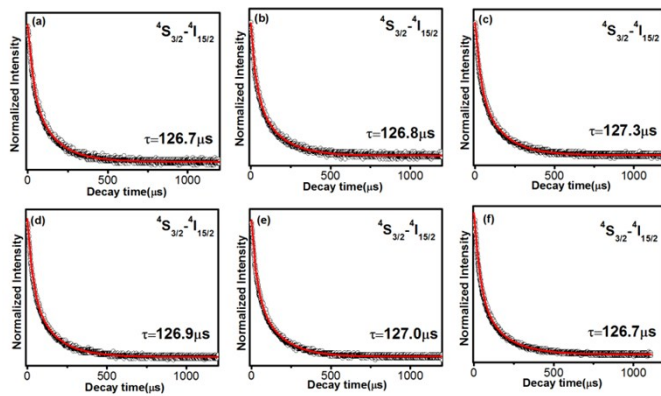

Figure S9 Dynamic curves of  ${}^4S_{3/2}$ - ${}^4I_{15/2}$  transition of  $\text{Er}^{3+}$  at different  $\text{Hg}^{2+}$  concentration under 980 nm light excitation in the human serum.

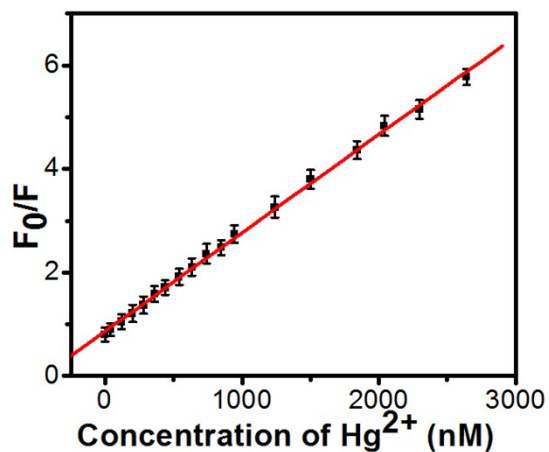

Figure S10 Fluorescence intensity ratio of FRET sensor as a function of  $\text{Hg}^{2+}$  concentration detected in human serum (0.15 g/mL).

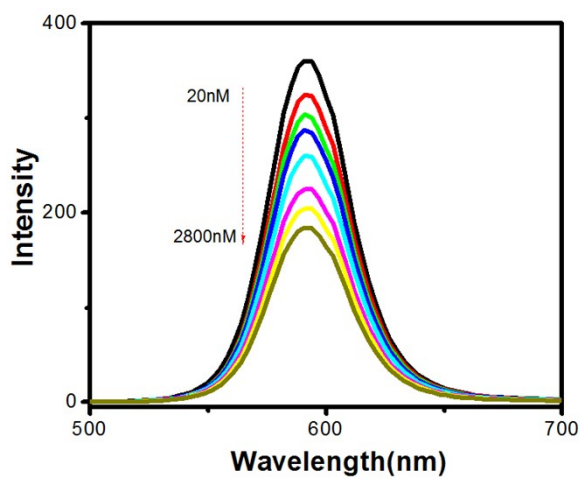

Figure S11 Fluorescence spectra of QDs with addition of various  $\text{Hg}^{2+}$  concentrations in PBS buffer.
